# Supplementary material
Source: MDPI journal article supplement (https://www.mdpi.com/2076-3271/11/2/30)
Supplement: s1 [file s1]

## Electrocardiographic Predictors of Atrial Fibrillation

Panagiota Anna Chousou MD, MRCP(UK), ECDS<sup>1,2</sup>,<sup>#</sup> Rahul Chattopadhyay MBBChir, MRCP(UK)<sup>1,2</sup>,<sup>#</sup> Vasiliki Tsampasian MD, MSc, MRCP(UK)<sup>1,3</sup> \* Vassilios S Vassiliou MA, MBBS, MRCP(UK), PhD, FHEA, FESC,<sup>1,3</sup> \* Peter John Pugh MBBS, MD, FRCP, FESC<sup>2</sup>

### Supplementary Material

| Supplemental Table 1: ECG criteria for LVH                                               |                                                                                                                                                                                                                                                                                                                                                                                                                                                                                                                                                                                                                                                                                             |
|------------------------------------------------------------------------------------------|---------------------------------------------------------------------------------------------------------------------------------------------------------------------------------------------------------------------------------------------------------------------------------------------------------------------------------------------------------------------------------------------------------------------------------------------------------------------------------------------------------------------------------------------------------------------------------------------------------------------------------------------------------------------------------------------|
| Criteria                                                                                 | Definition                                                                                                                                                                                                                                                                                                                                                                                                                                                                                                                                                                                                                                                                                  |
| Sokolow–Lyon <sup>1</sup>                                                                | S in V <sub>1</sub> + R in V <sub>5</sub> or V <sub>6</sub> (whichever is larger) ≥ 35 mm (≥ 7 large squares)<br>R in aVL ≥ 11 mm                                                                                                                                                                                                                                                                                                                                                                                                                                                                                                                                                           |
| Romhilt–Estes <sup>2</sup><br>(based on points: diagnostic >5 points, probable 4 points) | <u>3 points</u> <ul style="list-style-type: none"> <li>• R or S in limb leads ≥20 mm</li> <li>• S in V<sub>1</sub> or V<sub>2</sub> ≥30 mm</li> <li>• R in V<sub>5</sub> or V<sub>6</sub> ≥30 mm</li> <li>• ST-T vector opposite to QRS without digitalis</li> <li>• Negative terminal p wave in V<sub>1</sub> 1 mm in depth and 0.04 sec in duration</li> </ul> <u>2 points</u> <ul style="list-style-type: none"> <li>• Left axis deviation</li> </ul> <u>1 point</u> <ul style="list-style-type: none"> <li>• ST-T vector opposite to QRS with digitalis</li> <li>• QRS duration ≥0.09s</li> <li>• Delayed intrinsic deflection in V<sub>5</sub> or V<sub>6</sub> (&gt;0.05s)</li> </ul> |
| Cornell voltage <sup>3</sup>                                                             | S in V <sub>3</sub> + R in aVL > 28 mm (men)<br>S in V <sub>3</sub> + R in aVL > 20 mm (women)                                                                                                                                                                                                                                                                                                                                                                                                                                                                                                                                                                                              |
| Minnesota code <sup>4</sup>                                                              | Definite: very high QRS voltage plus ST-T changes<br>Probable: less high though abnormal QRS voltage plus ST-T changes<br>Possible: very high voltage only                                                                                                                                                                                                                                                                                                                                                                                                                                                                                                                                  |
| Gubner and Ungerleider Voltage                                                           | RI + SIII ≥ 2.2mV                                                                                                                                                                                                                                                                                                                                                                                                                                                                                                                                                                                                                                                                           |

| Supplemental table 2: QT correction formulae |                                  |
|----------------------------------------------|----------------------------------|
| QT correction                                | Formula                          |
| Bazzett <sup>5</sup>                         | $QT_c = \frac{QT}{\sqrt{RR}}$    |
| Hodges <sup>6</sup>                          | $QT_c = QT + 1.75 (HR - 60)$     |
| Framingham <sup>7</sup>                      | $QT_c = QT + 0.154 (1 - RR)$     |
| Fredericia <sup>8</sup>                      | $QT_c = \frac{QT}{\sqrt[3]{RR}}$ |

Supplemental table 3: Minnesota code ST-segment abnormalities

| Minnesota Code | ST-segment abnormality                                                                                                                                                                                                                                                                                                                                          |
|----------------|-----------------------------------------------------------------------------------------------------------------------------------------------------------------------------------------------------------------------------------------------------------------------------------------------------------------------------------------------------------------|
| Mild           | <ul style="list-style-type: none"> <li>• Flat T wave (code 5-3 or 5-4)</li> <li>• Negative or biphasic T-wave (negative-positive type) with a negative phase &lt; 1.0 mm (code 5-3)</li> </ul>                                                                                                                                                                  |
| Severe         | <ul style="list-style-type: none"> <li>• Negative or biphasic T-wave (negative-positive type) with negative phase <math>\geq 1.0</math> mm (code 5-1 or 5-2)</li> <li>• Horizontal or downward sloping ST-segment depression <math>\geq 0.5</math> mm (code 4-1 or 4-2)</li> <li>• Upward sloping ST depression <math>\geq 1.0</math> mm (code 4-4).</li> </ul> |
